# Supplementary material for: Anodizing Tungsten Foil with Ionic Liquids for Enhanced Photoelectrochemical Applications
Source: MDPI journal article supplement (doi:10.3390/ma17061243), 2024-03-08
Supplement: s1 [file s1]

## Supporting Information

### Anodizing tungsten foil with ionic liquids for enhancing photoelectrochemical applications

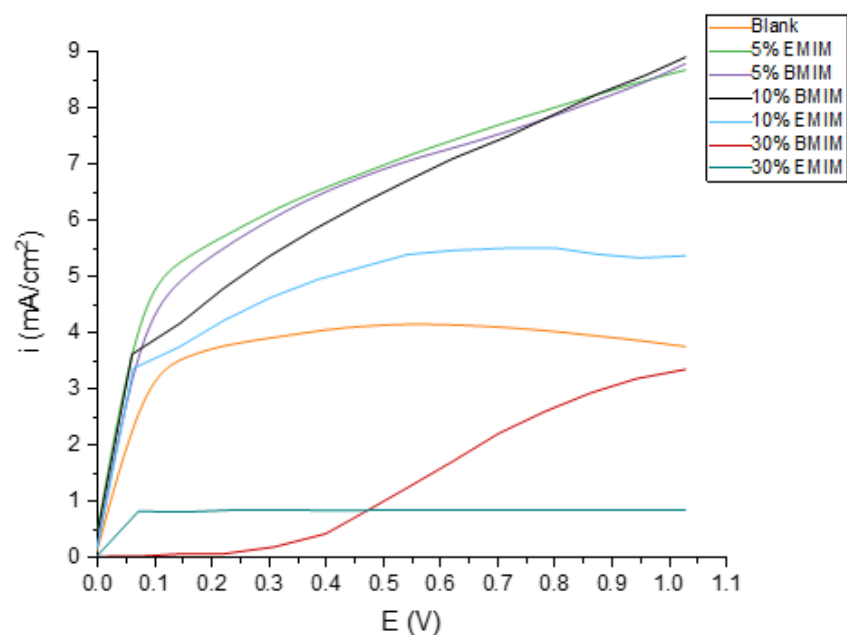

**Figure S1.** Photocurrent transient vs. potential of  $\text{WO}_3$  nanostructures synthesized by electrochemical anodization in different electrolytes (with and without IL) and with different concentrations of BMIM and EMIM (5, 10 and 30%).

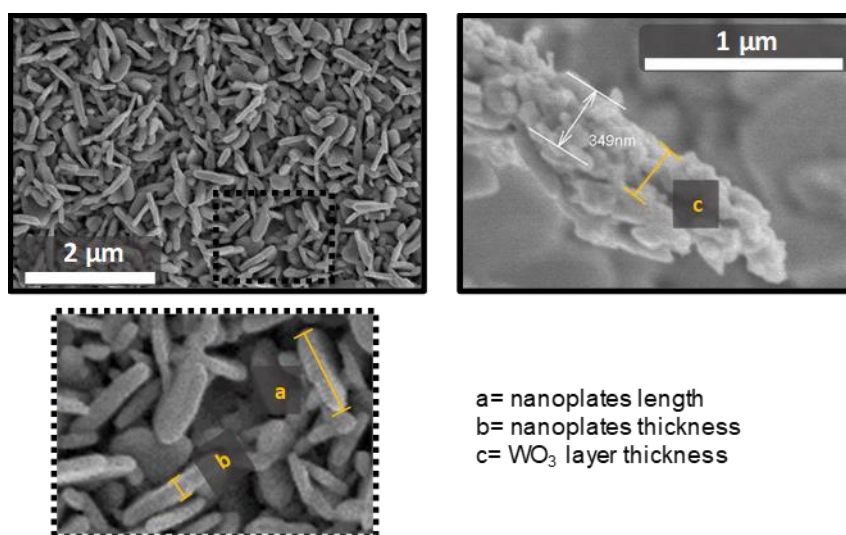

**Figure S2.** FESEM images of the  $\text{WO}_3$  nanostructure synthesized by electrochemical anodization with blank electrolyte. Top view (left) and cross section (right).

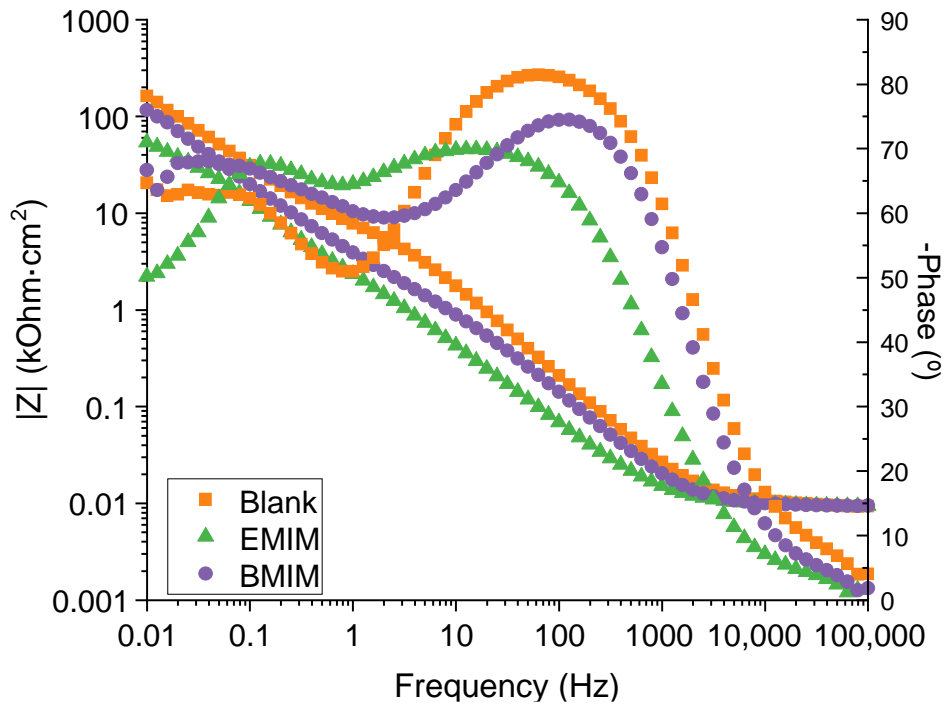

**Figure S3.** Bode-Module and Bode-phase plots  $\text{WO}_3$  nanostructures formed in electrolytes with and without IL.

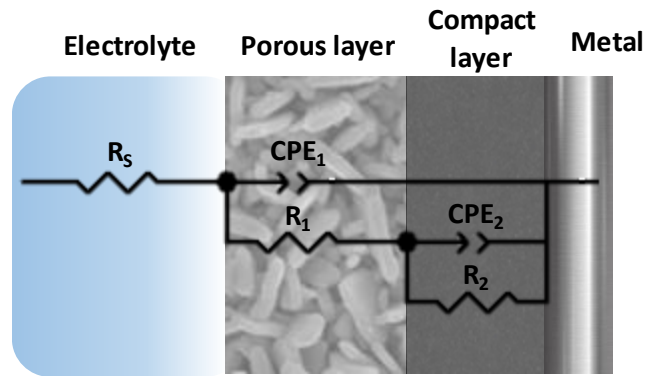

**Figure S4.** Equivalent circuit used for EIS fitting.

**Table S1.** Results of EIS fitting analysis

| Nanostructure | $R_s$ (Ohm) | CPE1-T<br>$F \cdot s^{(\alpha-1)}/\text{cm}^2$ | $\alpha_1$ | CPE2-T<br>$F \cdot s^{(\alpha-1)}/\text{cm}^2$ | $\alpha_2$ | $R_2$<br>(Ohm) |
|---------------|-------------|------------------------------------------------|------------|------------------------------------------------|------------|----------------|
| Blank         | 19.74       | 1.09E-05                                       | 0.9423     | 4.10E-05                                       | 0.7317     | 1E+20          |
| EMIM          | 18.48       | 8.12E-05                                       | 0.8133     | 3.00E-05                                       | 0.3896     | 1E+20          |
| BMIM          | 18.91       | 1.97E-05                                       | 0.9145     | 5.30E-05                                       | 0.7217     | 1E+20          |

Where: impedance values for  $\text{CPE}_i\text{-T}$  are calculated by  $\frac{1}{Y_0 \cdot (j\omega)^{\alpha_i}}$

$R_s$  is the resistance offered by the electrolyte

$R_2$  is the resistance of the bulk.

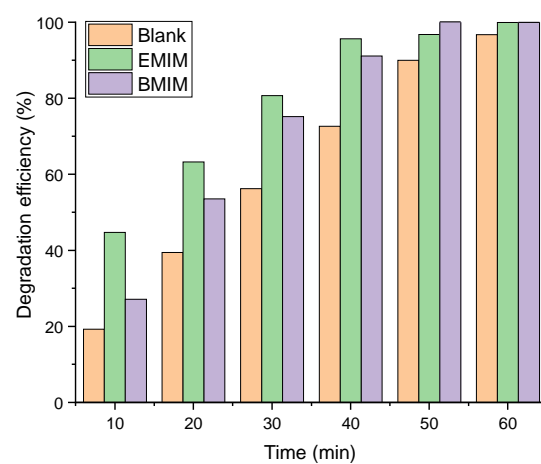

**Figure S5.** Methyl red degradation efficiency of the different nanostructures.
